# Supplementary material for: A novel fluorescence method for the highly sensitive detection of T4 polynucleotide kinase based on polydopamine nanotubes
Source: Royal Society of Chemistry journal article supplement (doi:10.1039/c9nj04381k), 2019-01-01

## Electronic Supplementary Information

### **A novel fluorescence method for highly sensitive detection of T4 polynucleotide kinase based on the polydopamine nanotubes**

Xue-Ping Shen, Jia Ge,\* Juan Chen, Yan-Mei Shen, Hong-Min Meng, Zhao-Hui Li,\*  
Ling-Bo Qu

\*Corresponding author.

College of Chemistry and Molecular Engineering, Zhengzhou University, Zhengzhou  
450001, P.R. China.

Tel.: +86-371-67780037.

E-mail address: [jjage0630@hnu.edu.cn](mailto:jjage0630@hnu.edu.cn) ; [zhaohui.li@zzu.edu.cn](mailto:zhaohui.li@zzu.edu.cn).

**Fig. S1.** Fluorescence intensity of 100 nM P1 via time in the presence of 8  $\mu\text{g mL}^{-1}$  of PDANTs. The assays were carried out in the Tris-HCl buffer.

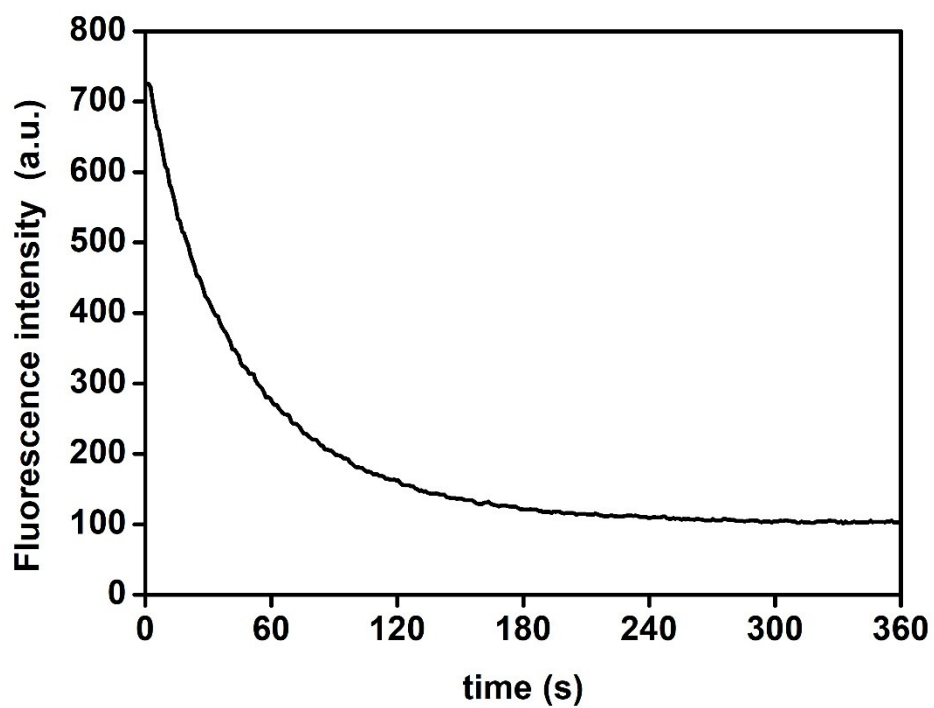

**Fig. S2.** Fluorescence intensity histogram of P1 + PDANTs (black histogram) and FAM labeled dsDNA + PDANTs (gray histogram) in the presence of 0, 2, 4, 6, 8 and 10  $\mu\text{g mL}^{-1}$  PDANTs (P1 100 nM, FAM labeled dsDNA 100 nM).

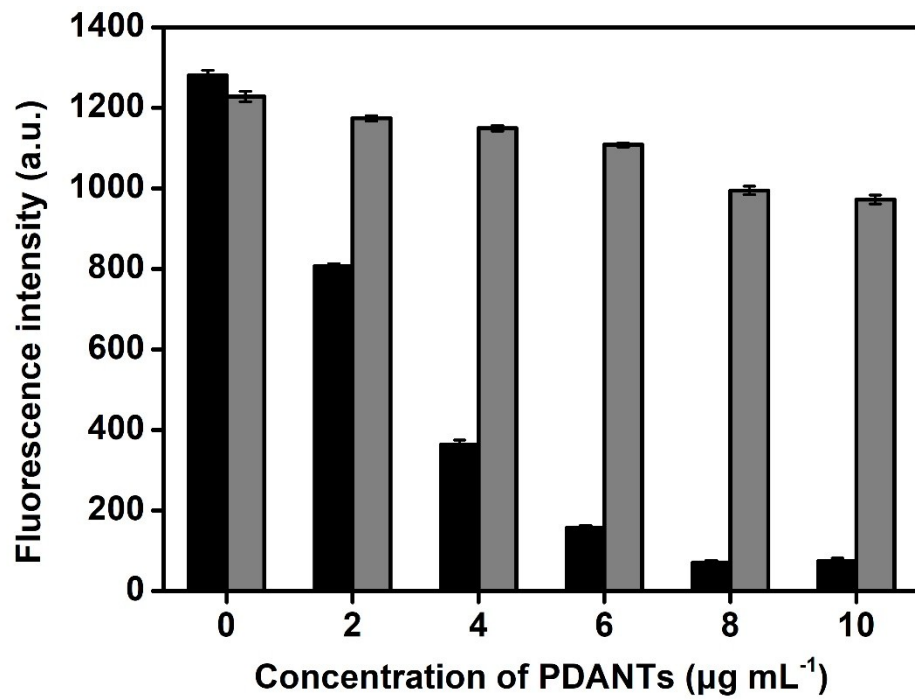

**Fig. S3.** Optimization of the reaction time. (FAM labeled dsDNA 100 nM, T4 PNK 50 U mL<sup>-1</sup>, PDANTs 8 μg mL<sup>-1</sup>, ATP 1mM, λ exonuclease 100 U mL<sup>-1</sup>, respectively).

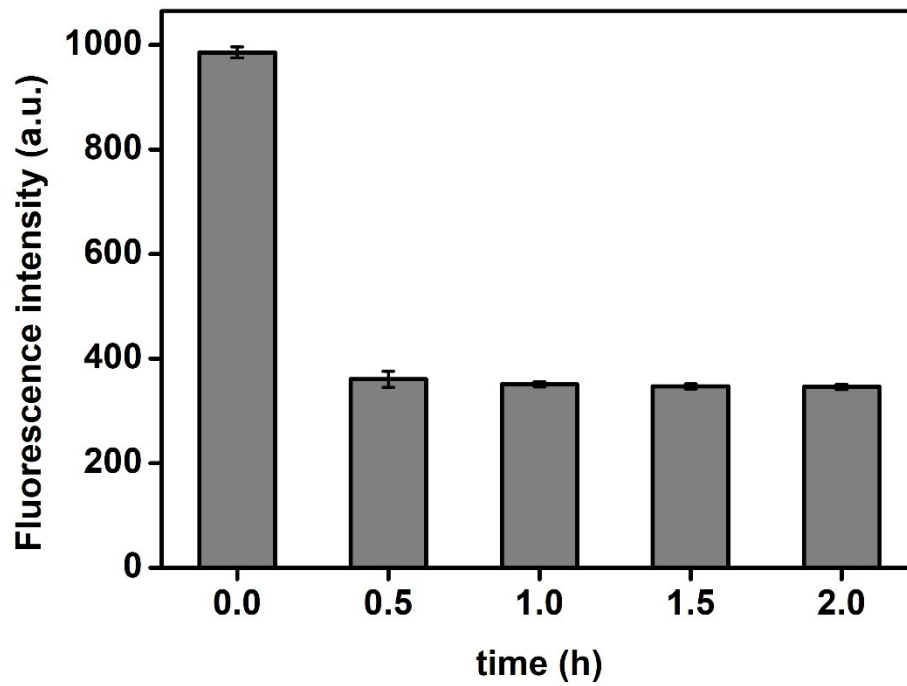

**Fig. S4.** Optimization of  $\lambda$  exonuclease concentration. (FAM labeled dsDNA 100 nM, T4 PNK 50 U mL<sup>-1</sup>, PDANTs 8  $\mu$ g mL<sup>-1</sup>, ATP 1mM, respectively)

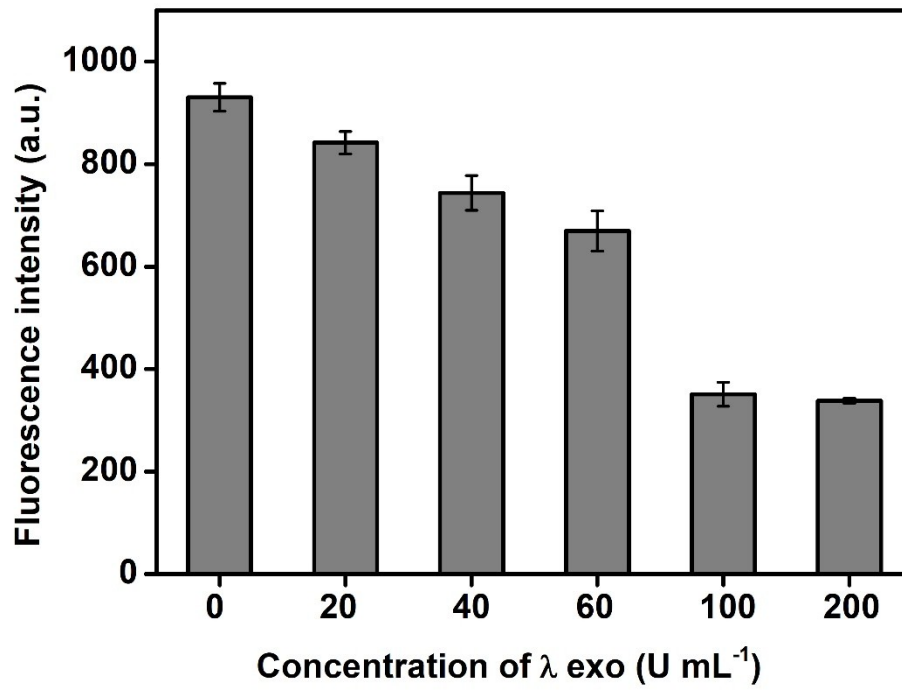

**Fig. S5.** Optimization of ATP concentration. (FAM labeled dsDNA 100 nM, T4 PNK 50 U mL<sup>-1</sup>, PDANTs 8 μg mL<sup>-1</sup>, λ exonuclease 100 U mL<sup>-1</sup>, respectively)

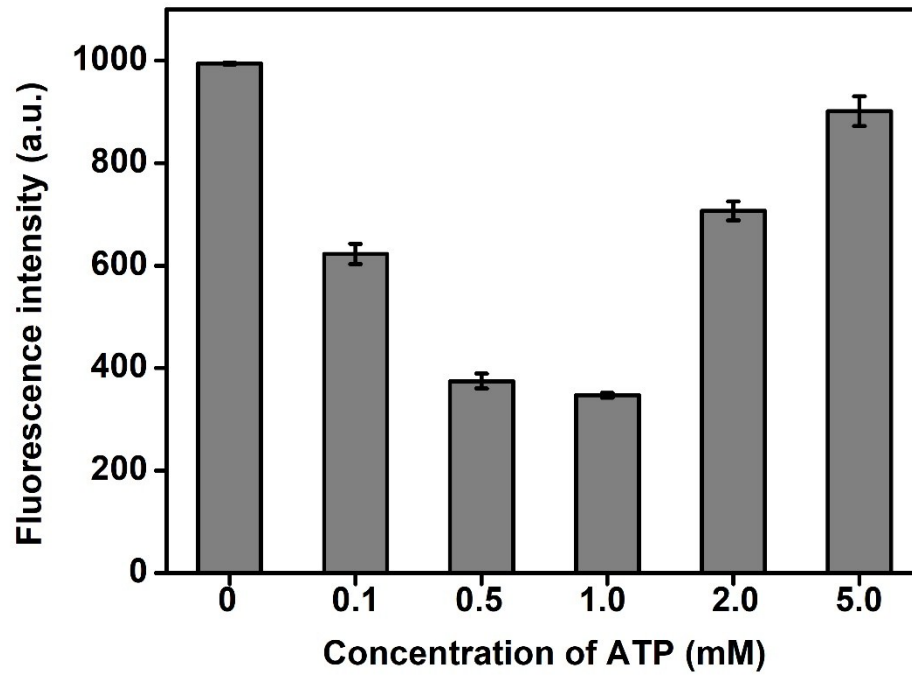

**Fig. S6.** Fluorescence intensity of P1 without (a) and with (d) incubation with  $8 \mu\text{g mL}^{-1}$  PDANTs. Fluorescence intensity of FAM labeled dsDNA after incubation without (b) and with (c)  $8 \mu\text{g mL}^{-1}$  PDANTs. The assays were all carried out in the reaction buffer containing 1% (v/v) cell extracts. (P1 100 nM, FAM labeled dsDNA 100 nM)

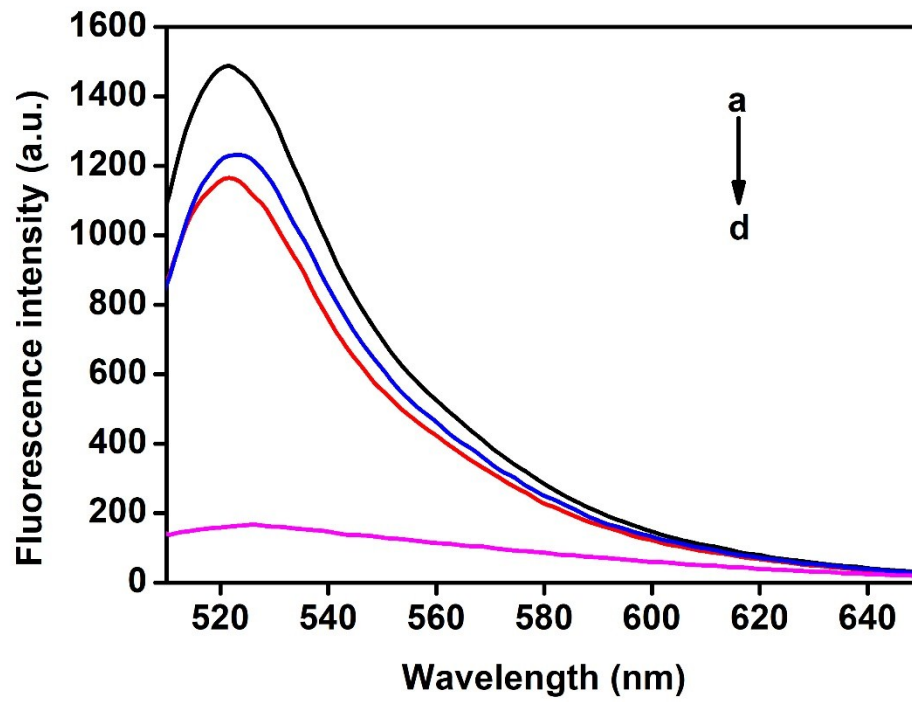

**Fig. S7.** (a) The fluorescence intensity with different concentration of T4 PNK in reaction buffer containing 1% (v/v) cell extracts. (b) The dependence of fluorescence intensity on the logarithm of the T4 PNK concentration in reaction buffer containing 1% (v/v) cell extracts. (FAM-labeled dsDNA 100 nM, ATP 1 mM,  $\lambda$  exonuclease 50 units). The error bars represent standard deviation (SD) across three repetitive experiments.

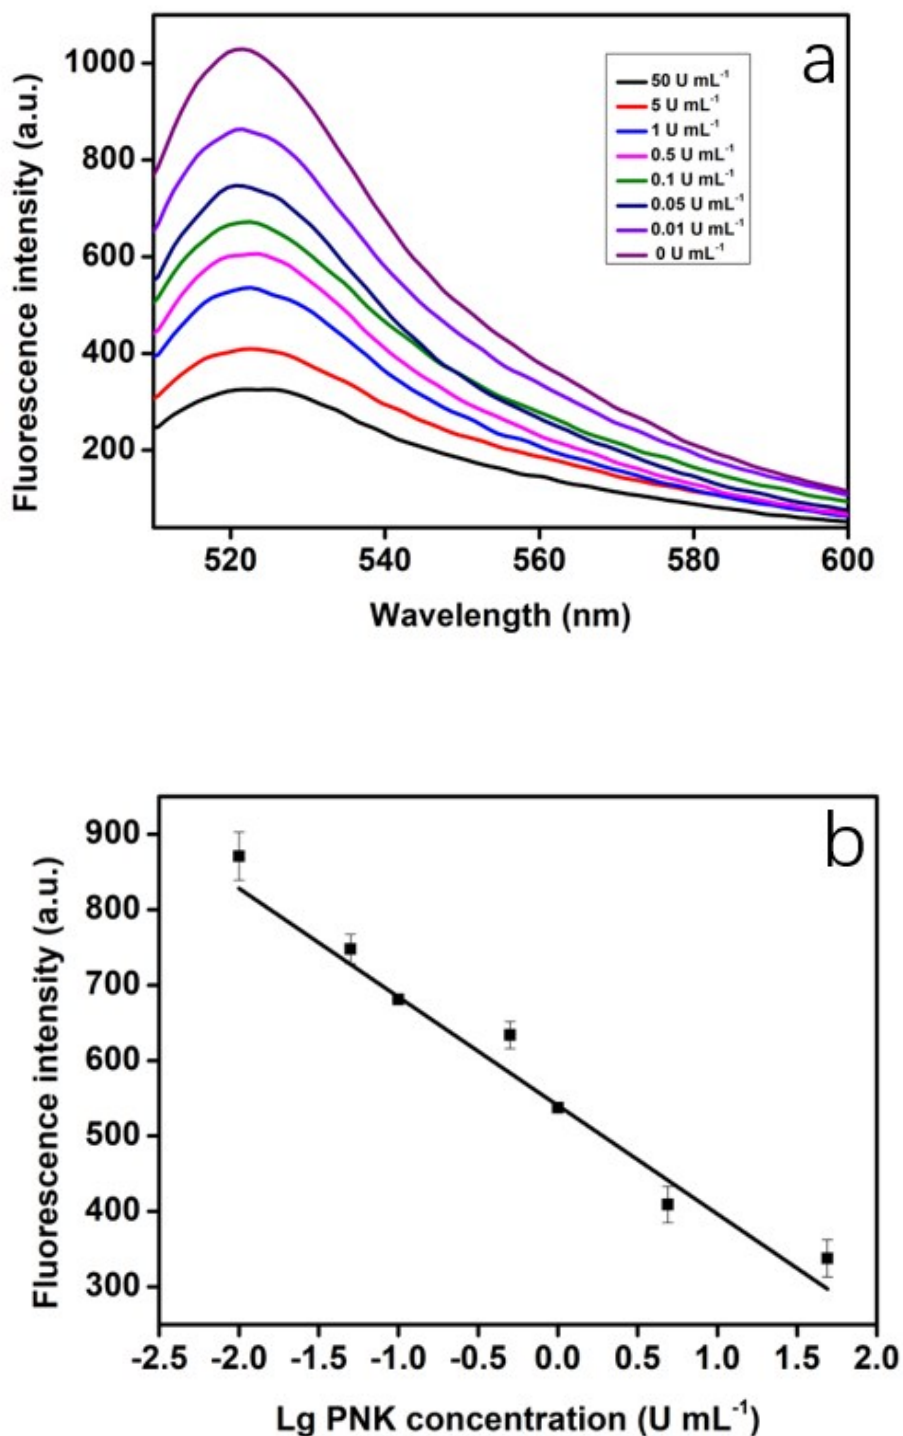

Supplement: c9nj04381k1.pdf [file c9nj04381k1.pdf]
